# Supplementary material for: Core-softened water–alcohol mixtures: the solute-size effects
Source: Royal Society of Chemistry journal article supplement (doi:10.1039/d1cp00751c), 2021-01-01
Supplement: d1cp00751c1.pdf [file d1cp00751c1.pdf]

# **Core-softened water-alcohol mixtures: the solute-size effects**

## **Electronic Supplementary material**

Murilo S. Marques <sup>\*1,2</sup>, Vinicius Fonseca Hernandes<sup>3</sup>, and José Rafael  
Bordin<sup>3</sup>

<sup>1</sup>Centro das Ciências Exatas e das Tecnologias, Universidade Federal do Oeste da Bahia, Rua  
Bertioga, 892, Morada Nobre, CEP 47810-059, Barreiras-BA, Brazil

<sup>2</sup>Instituto de Física, Universidade Federal do Rio Grande do Sul, Av. Bento Gonçalves 9500, Caixa  
Postal 15051, CEP 91501-970, Porto Alegre - RS, Brazil

<sup>3</sup>Departamento de Física, Instituto de Física e Matemática, Universidade Federal de Pelotas. Caixa  
Postal 354, 96001-970, Pelotas, Brazil.

---

\*e-mail: murilo.sodre@ufob.edu.br

# 1 Isobars with Temperature of Maximum Density (TMD)

## 1.1 Pure CSW potential

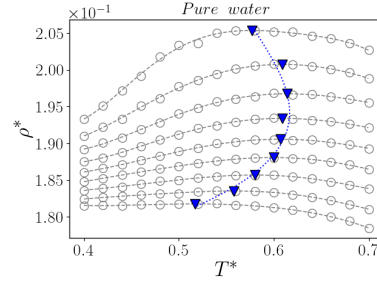

Figure 1: Isobars with temperature of maximum density (TMD) for pure CS water. From bottom to top:  $P^* = 0.02, 0.03, 0.04, \dots, 0.10$ .

## 1.2 Methanol

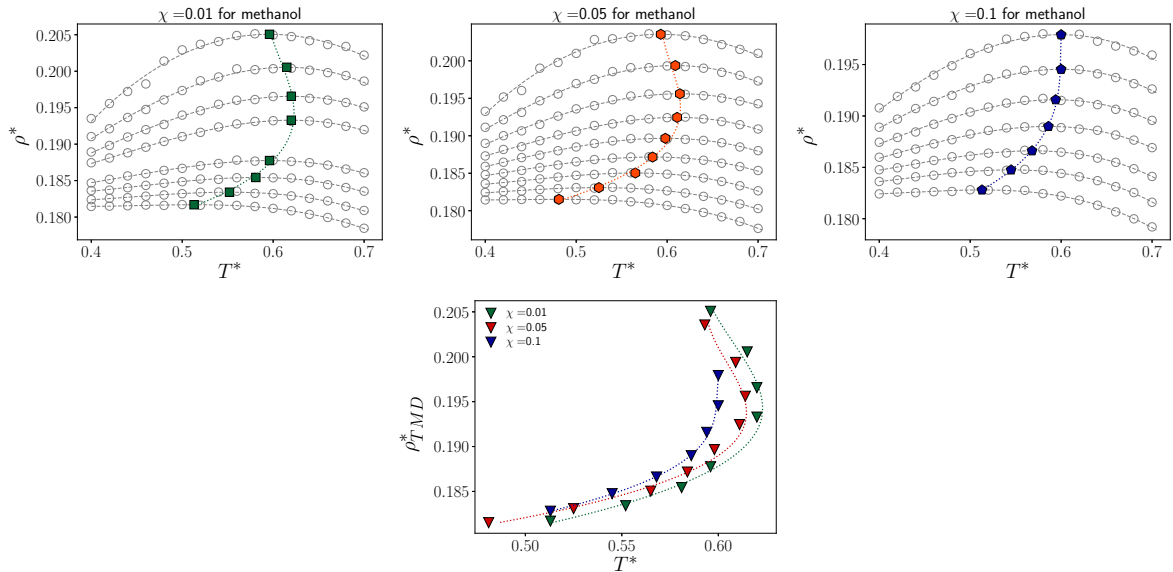

Figure 2: Isobars with temperature of maximum density (TMD) for all concentrations analyzed in methanol aqueous solutions. For two first concentrations ( $\chi = 0.01$  and  $\chi = 0.05$ ), and from bottom to top:  $P^* = 0.02, 0.03, 0.04, \dots, 0.10$ . For last concentration ( $\chi = 0.10$ ), we have  $P^* = 0.03, 0.04, \dots, 0.09$ .

## 1.3 Ethanol

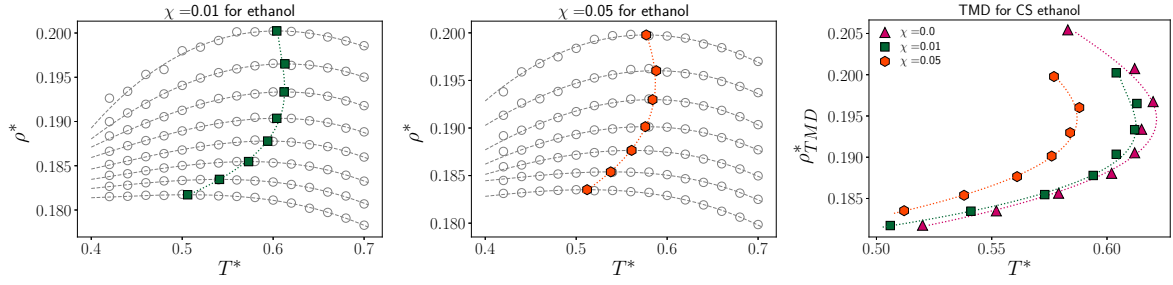

Figure 3: Isobars with temperature of maximum density (TMD) for all concentrations analyzed in ethanol aqueous solutions. For the first concentration ( $\chi = 0.01$ ), and from bottom to top:  $P^* = 0.02, 0.03, 0.04, \dots, 0.09$ . For last concentration ( $\chi = 0.05$ ), we have  $P^* = 0.03, 0.04, \dots, 0.09$

## 1.4 Propanol

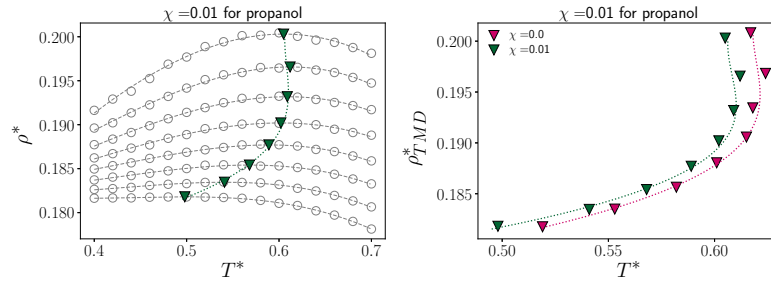

Figure 4: Isobars with temperature of maximum density (TMD) for all concentrations analyzed in propanol aqueous solutions. From bottom to top:  $P^* = 0.02, 0.03, 0.04, \dots, 0.09$ .

## 2 Isobars in Density-temperature plane for all solutions

### 2.1 Methanol

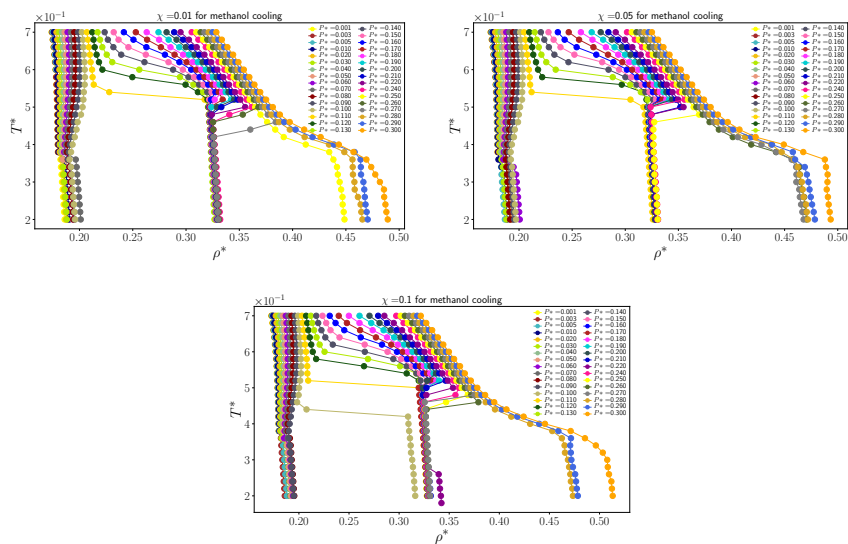

Figure 5: Isobars in aqueous solutions of methanol for all temperatures simulated in this work.

## 2.2 Ethanol

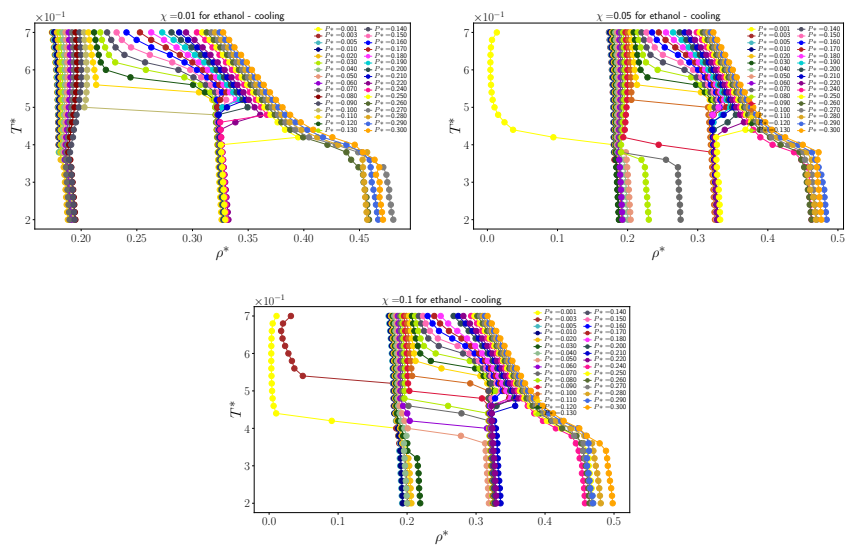

Figure 6: Isobars in aqueous solutions of ethanol for all temperatures simulated in this work.

## 2.3 Propanol

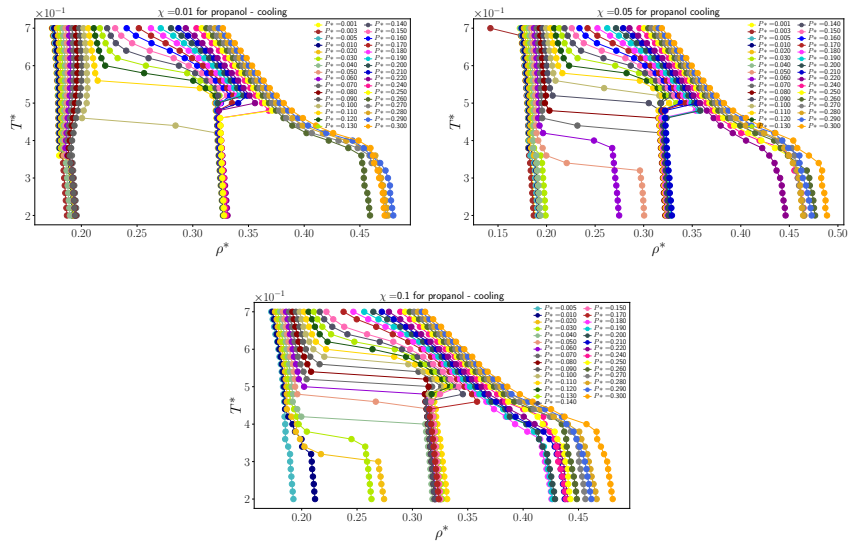

Figure 7: Isobars in aqueous solutions of propanol for all temperatures simulated in this work.

### 3 Peaks and discontinuities in Isothermal Compressibility

#### 3.1 Pure CSW potential

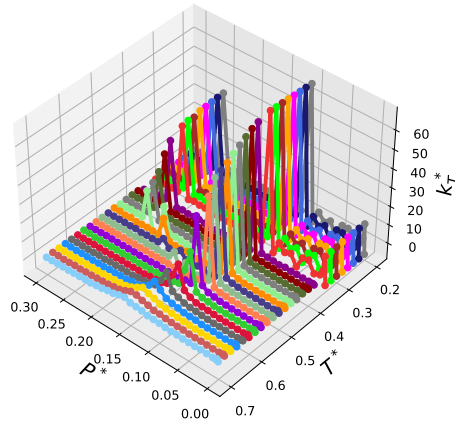

Figure 8: Peaks in  $\kappa_T$  for pure CSW potential ( $x_1 = 0.00$ ).

### 3.2 Solutions of methanol, ethanol and 1-propanol

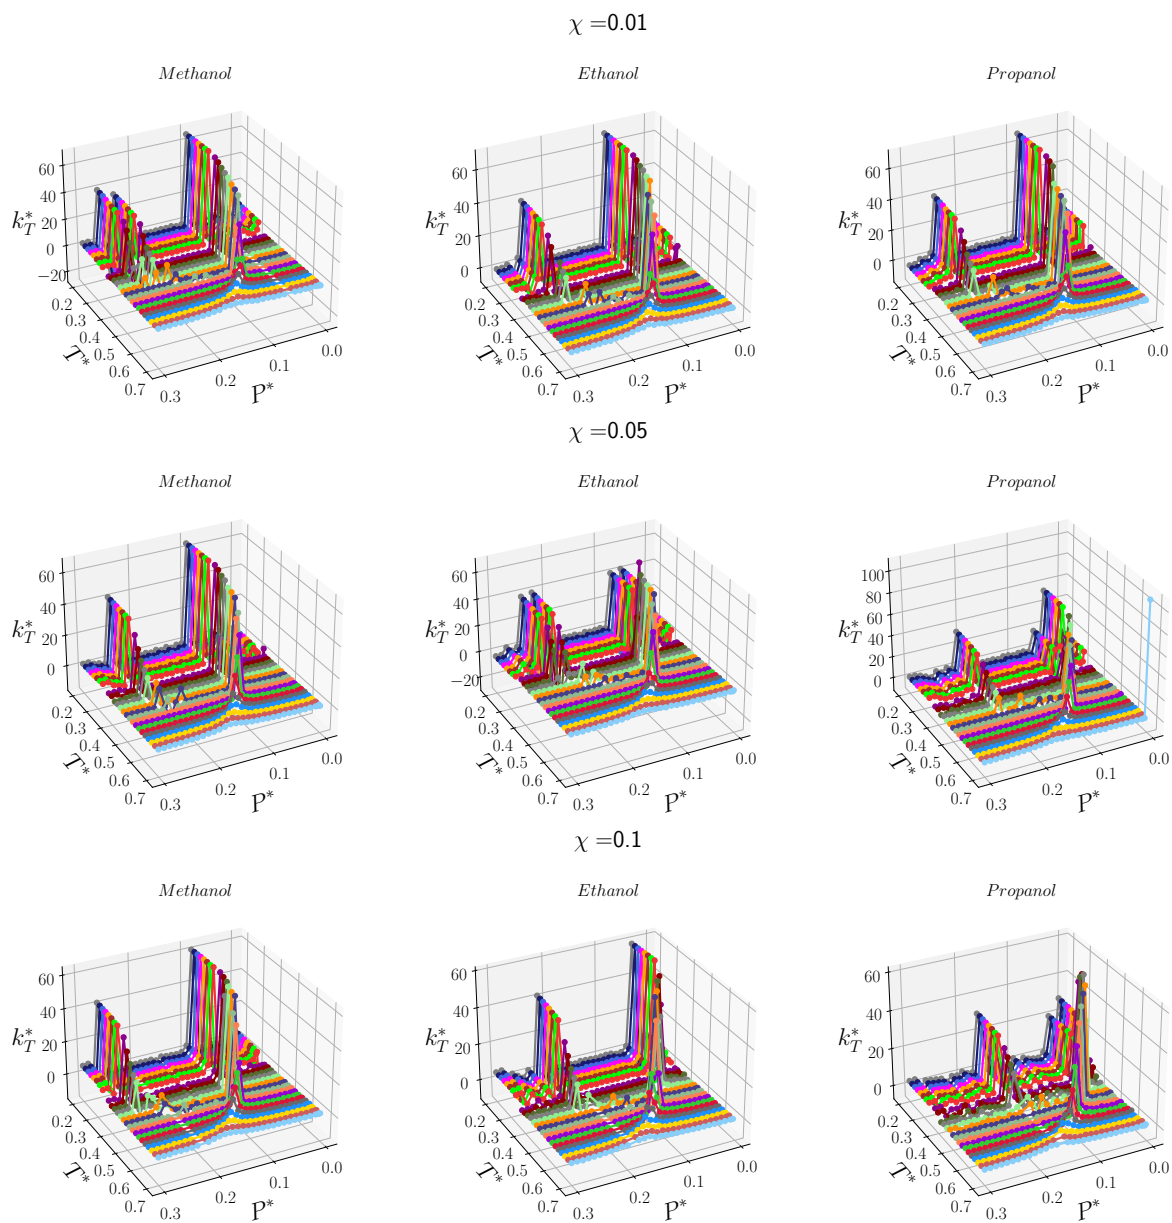

Figure 9: Peaks in  $\kappa_T$  for  $x_1 = 0.01, 0.05$  and  $0.1$ .

## 4 Peaks and discontinuities in Specific heat at constant pressure

### 4.1 Pure CSW potential

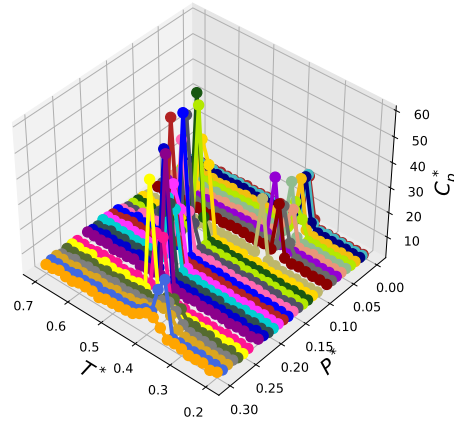

Figure 10: Peaks in  $c_p(T)$  for pure CSW potential ( $x_1 = 0.00$ ).

### 4.2 Solutions of methanol, ethanol and 1-propanol

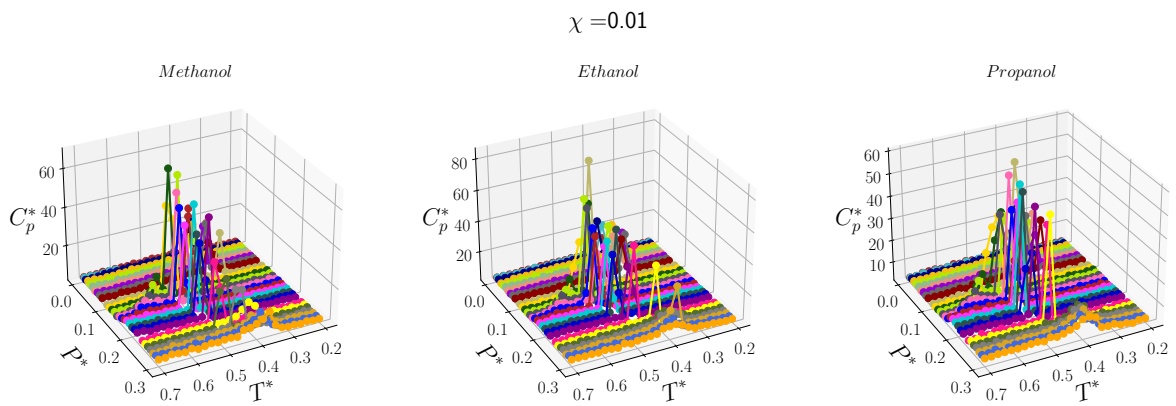

Figure 11: Peaks in  $c_p(T)$  for  $x_1 = 0.01$ .

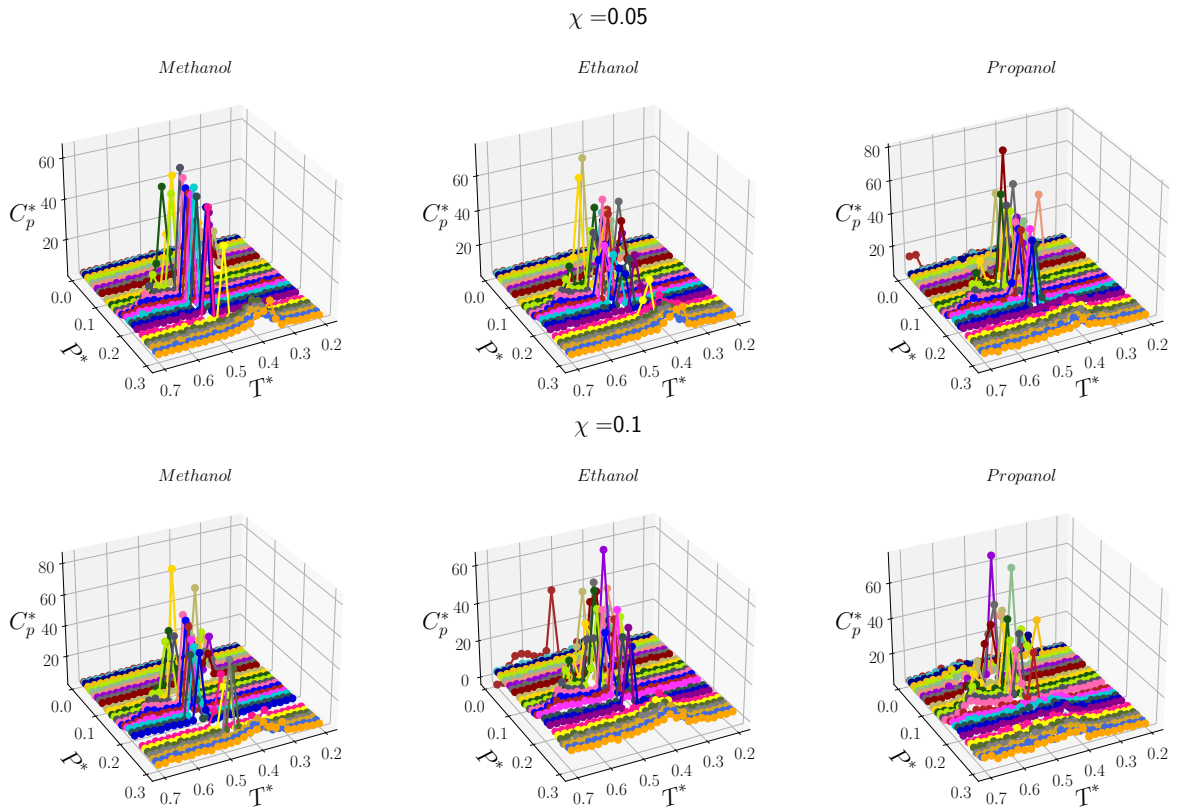

Figure 12: Peaks in  $c_p(T)$  for  $x_1 = 0.05$  and  $0.1$ .

## 5 Peaks and discontinuities in Isobaric compressibility coefficient of thermal expansion

### 5.1 Pure CSW potential

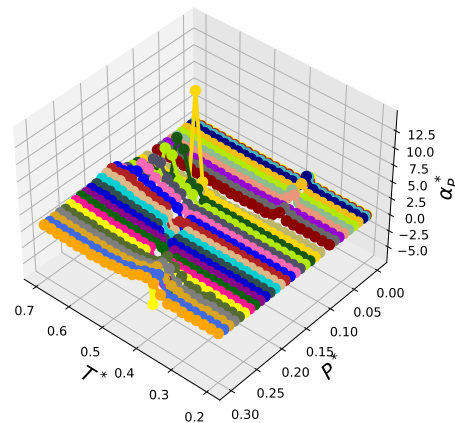

Figure 13: Peaks in  $\alpha_p(T)$  for pure CSW potential ( $x_1 = 0.00$ ).



## 5.2 Solutions of methanol, ethanol and 1-propanol

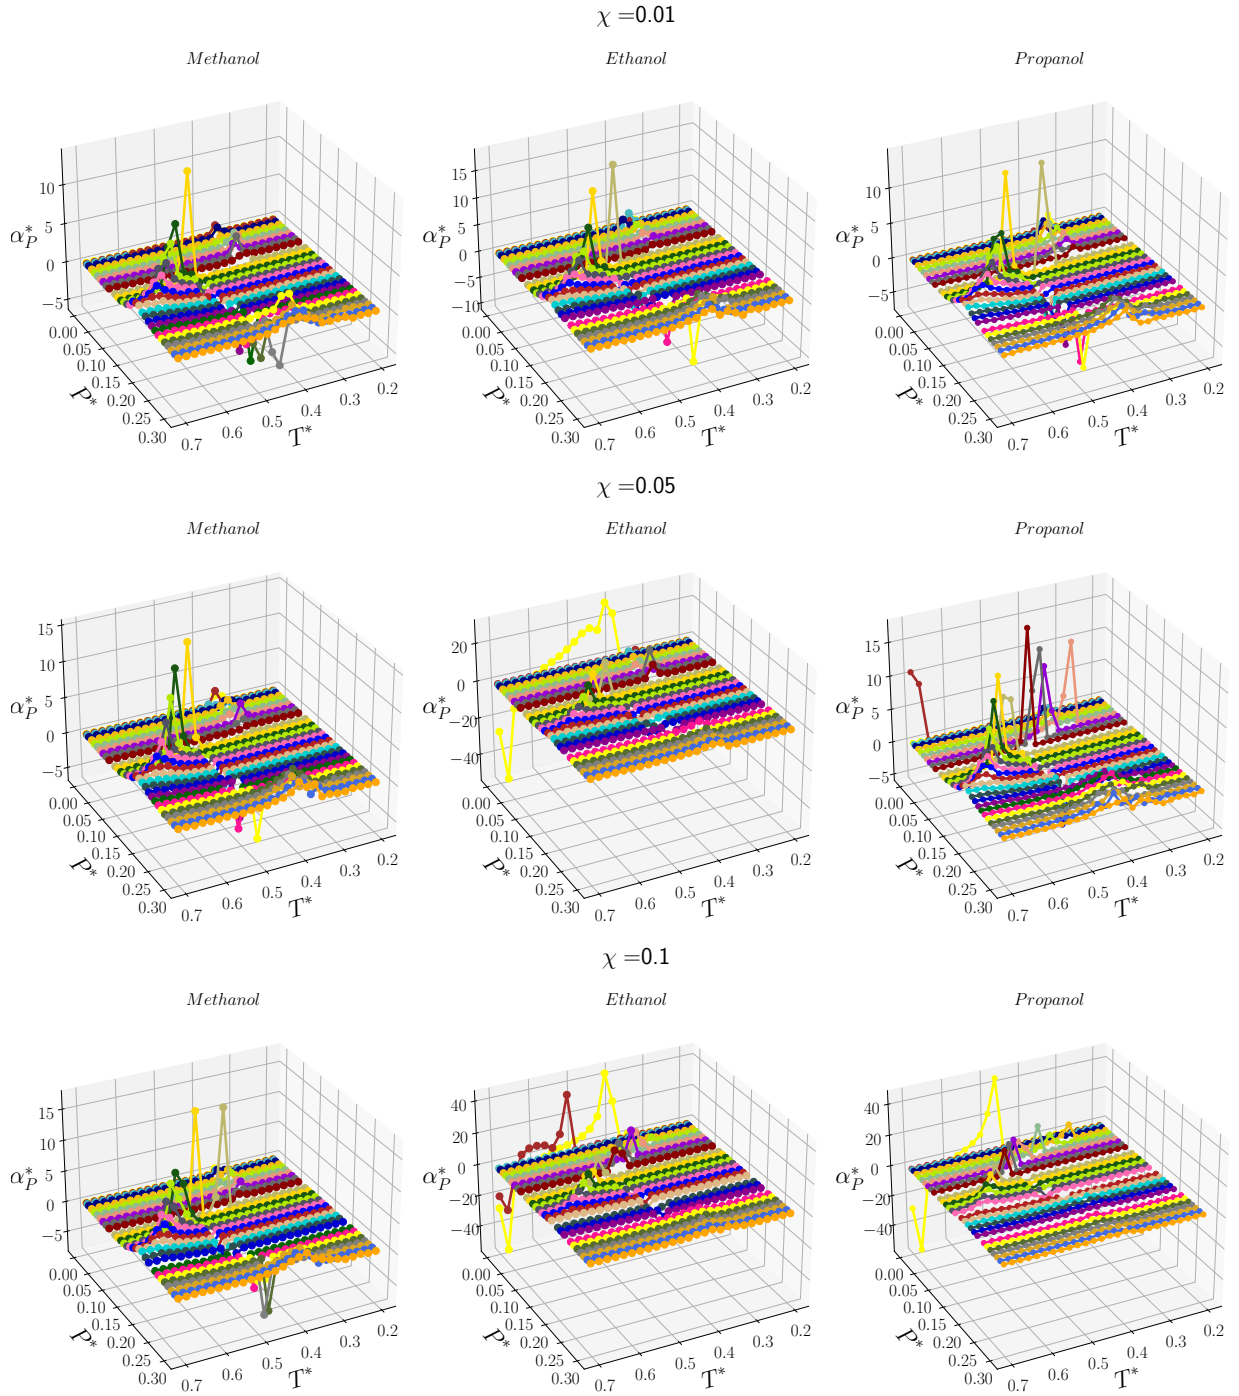

Figure 14: Peaks in  $\alpha_P(T)$  for  $x_1 = 0.01, 0.05$  and  $0.1$ .

## 6 Critical values

| Pure CSW potential |         |         |            |
|--------------------|---------|---------|------------|
| $\chi$             | $P_c^*$ | $T_c^*$ | $\rho_c^*$ |
| 0.00               | 0.125   | 0.590   | 0.2472     |
| Methanol           |         |         |            |
| $\chi$             | $P_c^*$ | $T_c^*$ | $\rho_c^*$ |
| 0.01               | 0.120   | 0.590   | 0.250124   |
| 0.05               | 0.120   | 0.590   | 0.255124   |
| 0.10               | 0.130   | 0.590   | 0.259300   |
| Ethanol            |         |         |            |
| $\chi$             | $P_c^*$ | $T_c^*$ | $\rho_c^*$ |
| 0.01               | 0.130   | 0.600   | 0.241481   |
| 0.05               | 0.130   | 0.600   | 0.242836   |
| 0.10               | 0.125   | 0.600   | 0.261500   |
| Propanol           |         |         |            |
| $\chi$             | $P_c^*$ | $T_c^*$ | $\rho_c^*$ |
| 0.01               | 0.120   | 0.580   | 0.256308   |
| 0.05               | 0.110   | 0.590   | 0.249583   |
| 0.10               | 0.110   | 0.590   | 0.252400   |

Table 1: Critical values for pressure, temperature and density for all concentrations.

## 7 Structural order parameter for all solutions

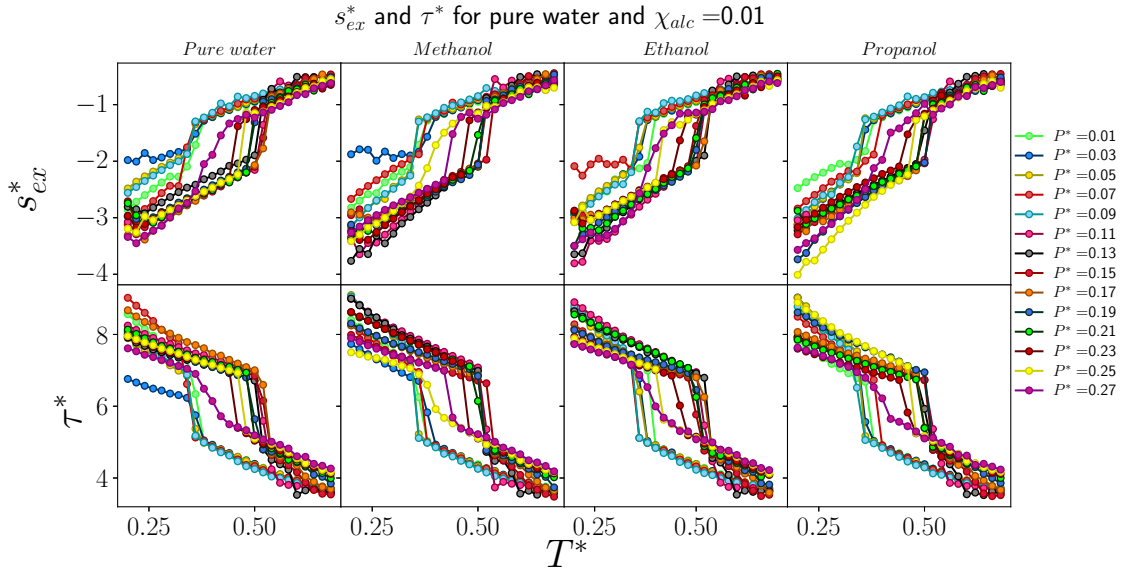

Figure 15:  $s_{ex}^*$  and  $\tau^*$  behavior for ( $\chi_{alc} = 0.01$ ).

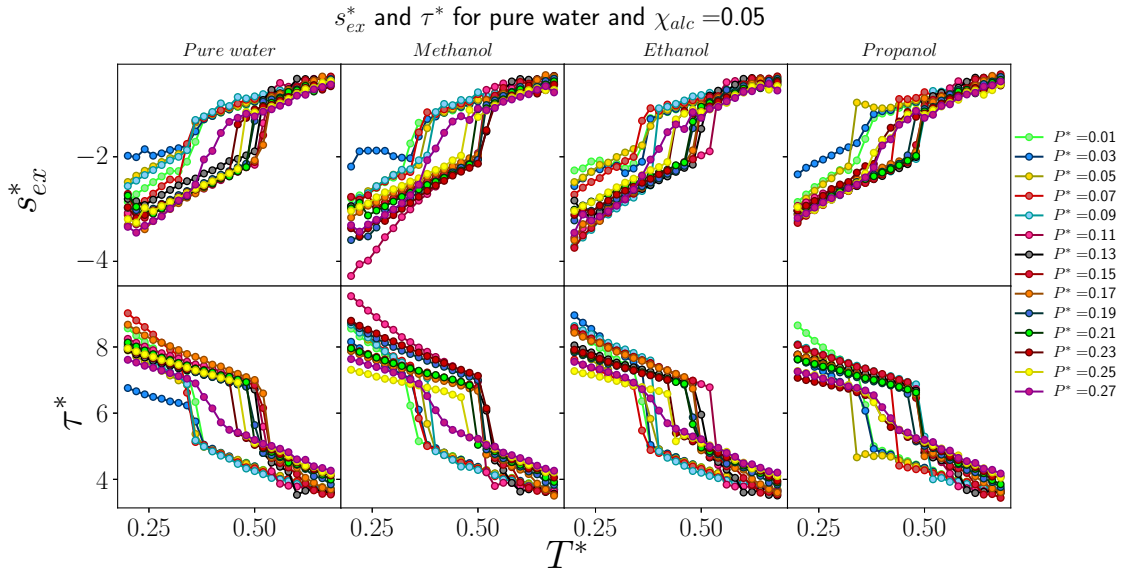

Figure 16:  $s_{ex}^*$  and  $\tau^*$  behavior for ( $\chi_{alc} = 0.05$ ).

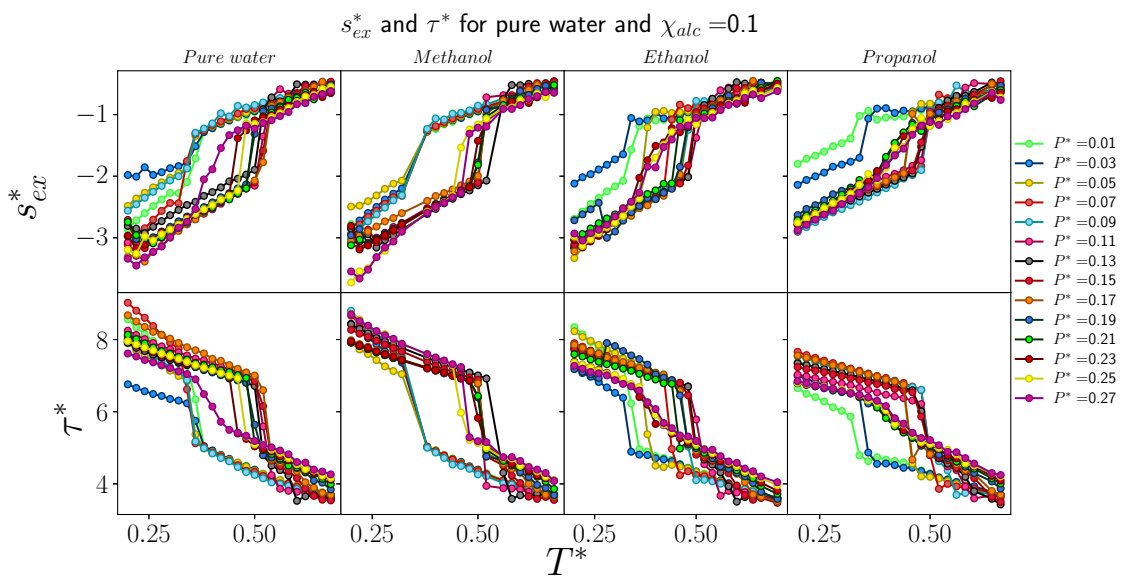

Figure 17:  $s_{ex}^*$  and  $\tau^*$  behavior for ( $\chi_{alc} = 0.10$ ).
